# Supplementary material for: Entrustable Professional Activities in Hematopathology Pathology Fellowship Training: Consensus Design and Proposal
Source: PubMed Central journal article supplement — Acad Pathol. 2021 Feb 17;8:2374289521990823. doi: 10.1177/2374289521990823 (PMC7894592; doi:10.1177/2374289521990823), 2021-02-17
Supplement: sj-pdf-3-apc-10.1177_2374289521990823.pdf [file sj-pdf-3-apc-10.1177_2374289521990823.pdf]

## Supplementary Figure 4: Factfinding Program Director Survey Responses

*Question 5: What professional tasks and responsibilities do you give your fellows feedback on during fellowship? An example would be "clinician-requested review of a peripheral blood smear"*

*Question 6: Of the tasks and responsibilities you described above on which you give your fellows feedback, which do you consider to be EPAs?*

### **Question 5: What professional tasks and responsibilities do you give your fellows feedback on during fellowship?**

Case report write ups (does it answer the clinical question? is it to the point, with pertinent positives, negatives, and suggested next steps easy to find?)

Ordering patterns for IHC

Presentation at tumor boards/conferences

Peripheral blood/body fluid reviews

Work up of cases; IHC, Flow, Cytogenomics, FISH, NGS

Flow cytometry gating

IHC stain interpretation

Interpretation of data

Write up of reports

PB smear review

Presentation review; tumor boards, local, regional, national, international meetings

Providing preliminary results to clinicians

Reviewing cases and writing up reports independently (peripheral smears and bone marrows)

Ensuring appropriate ancillary testing for marrows

Presenting at multi-disciplinary conferences

Teaching residents and medical students

Signing out bone marrow, lymph node and tissue cases.

Interpreting coagulation testing.

Interpreting peripheral smears and body fluids.

Interpreting flow cytometry.

Performing bone marrow biopsies.

Presentations (to clinical teams and to the department).

Taking call on the weekend.

Preliminary review and results of peripheral blood and bone marrow with discussion with clinicians

Writing BM reports

Writing LN reports

Ordering stains independently

Calling back consults to clients

Teaching at the scope

### **Question 6: is this an EPAs?**

yes

no

yes

maybe

yes

yes

yes

yes

yes

yes

yes

|                                                                                                                                                                                                                                                                                |     |
|--------------------------------------------------------------------------------------------------------------------------------------------------------------------------------------------------------------------------------------------------------------------------------|-----|
| Teaching in tumor board/lecture                                                                                                                                                                                                                                                | yes |
| Diagnosis and reports                                                                                                                                                                                                                                                          | no  |
| Interpretation of flow cytometry                                                                                                                                                                                                                                               | no  |
| PB smears                                                                                                                                                                                                                                                                      | no  |
| Clinician-requested review of a peripheral blood smear.                                                                                                                                                                                                                        | yes |
| Ordering of immunohistochemistry and other ancillary studies on cases                                                                                                                                                                                                          | yes |
| Differential diagnosis generation in reports                                                                                                                                                                                                                                   | no  |
| Presentation at tumor boards and journal clubs                                                                                                                                                                                                                                 | yes |
| Discussion of complex cases with clinical teams                                                                                                                                                                                                                                | yes |
| Tumor board presentation                                                                                                                                                                                                                                                       | yes |
| Handling of on call cases                                                                                                                                                                                                                                                      | yes |
| Clinical reports                                                                                                                                                                                                                                                               | yes |
| Professionalism in handling clinician emails and calls                                                                                                                                                                                                                         | yes |
| Timeliness of case reports                                                                                                                                                                                                                                                     | no  |
| Bone marrow procedures                                                                                                                                                                                                                                                         | yes |
| Quality of written bone marrow reports                                                                                                                                                                                                                                         | yes |
| Quality of written lymph node biopsy reports                                                                                                                                                                                                                                   | yes |
| Ability to lead effective fellow-clinician interactions                                                                                                                                                                                                                        | yes |
| Quality of Hematopathology Fellow-lead Heme/Onc tumor board.                                                                                                                                                                                                                   | yes |
| The technical ability of fellow: bone marrow biopsies; flow cytometry; special coagulation assays.                                                                                                                                                                             | yes |
| Fellow's ability to gather and synthesize patient-specific clinical information.                                                                                                                                                                                               | yes |
| Fellow's communication skills (exercised with attendings, oncologists, technologists, residents, students)                                                                                                                                                                     | yes |
| Initial review of stat leukemia aspirates.                                                                                                                                                                                                                                     | n/a |
| "Junior Attending" duties which involve working up and writing up all marrows/lymph nodes/flow cytometry cases without attending. Cases are given to attending for final sign out when complete. "Junior attending" duties include teaching of residents and medical students. | n/a |
| Preliminary interpretation of flow cytometry results with communication to clinicians.                                                                                                                                                                                         | n/a |
| Decisions on appropriate workup of specimens                                                                                                                                                                                                                                   | n/a |
| Production of a complete draft hematopathology report on bone marrow or tissue specimens.                                                                                                                                                                                      | n/a |
| Presentation at journal clubs                                                                                                                                                                                                                                                  | n/a |
| Bone marrow aspirate review,                                                                                                                                                                                                                                                   | no  |
| Lymph node biopsy review,                                                                                                                                                                                                                                                      | no  |
| Flow cytometry review                                                                                                                                                                                                                                                          | no  |
| Report write ups                                                                                                                                                                                                                                                               | n/a |
| Prelim diagnoses given prior to attending signout                                                                                                                                                                                                                              |     |
| Presentation at tumor board.                                                                                                                                                                                                                                                   | yes |
| Communication with clinical team.                                                                                                                                                                                                                                              | yes |

|                                                                           |     |
|---------------------------------------------------------------------------|-----|
| Formal teaching of residents ("acting attending").                        | yes |
| Preparing pathology reports.                                              | yes |
| Ordering appropriate genetic/molecular testing.                           | yes |
| Incorporating the results of ancillary testing into the pathology report. | yes |
| Presentation style and content                                            | yes |
| Responsiveness to email and clinical requests                             | yes |
| Completeness and accuracy of case preview                                 | yes |
| Ability to direct and order ancillary testing                             | yes |
| Ability to oversee residents                                              | yes |
